# Supplementary material for: Experimental and theoretical studies on efficient carbon dioxide capture using novel bis(3-aminopropyl)amine (APA)-activated aqueous 2-amino-2-methyl-1-propanol (AMP) solutions
Source: Royal Society of Chemistry journal article supplement (doi:10.1039/c7ra01286a), 2017-01-01
Supplement: c7ra01286a1.pdf [file c7ra01286a1.pdf]

**Supporting Information for**  
**Experimental and Theoretical Studies on Efficient Carbon Dioxide**  
**Capture using Novel Bis(3-aminopropyl)amine (APA) Activated Aqueous**  
**2-Amino-2-methyl-1-propanol (AMP) Solutions**

**Bisweswar Das, Binay Deogam and Bishnupada Mandal \***

Department of Chemical Engineering, Indian Institute of Technology Guwahati,

Guwahati - 781039, Assam, India.

---

\*Corresponding author. Telephone: 91-361-2582256 (O)/2584256 (R). Fax: 91-361-2582291. Email:  
[bpmandal@iitg.ernet.in](mailto:bpmandal@iitg.ernet.in)

**Table S1: Reaction scheme for the reactions of CO<sub>2</sub> into novel (AMP+APA+H<sub>2</sub>O) systems**

| Type of Reaction                                                                  | Reactions                                                                       | No. |
|-----------------------------------------------------------------------------------|---------------------------------------------------------------------------------|-----|
| Base-catalysed hydration reaction                                                 | $CO_2 + AMP + H_2O \xrightleftharpoons{K_a, k_{2a}} AMPH^+ + HCO_3^-$           | 1   |
| Monocarbamate formation by APA/H <sub>2</sub> O                                   | $CO_2 + APA + H_2O \xrightleftharpoons{K_b, k_{2b}} APACOO^- + H_3O^+$          | 2   |
| Monocarbamate formation by AMP/APA                                                | $CO_2 + APA + AMP \xrightleftharpoons{K_c, k_{2c}} APACOO^- + AMPH^+$           | 3   |
| Dicarbamate formation by APA/H <sub>2</sub> O                                     | $CO_2 + APACOO^- + H_2O \xrightleftharpoons{K_d, k_{2d}} APA(COO^-)_2 + H_3O^+$ | 4   |
| Dicarbamate formation by AMP/APACOO <sup>-</sup>                                  | $CO_2 + APACOO^- + AMP \xrightleftharpoons{K_e, k_{2e}} APA(COO^-)_2 + AMPH^+$  | 5   |
| Bicarbonate formation by direct reaction of CO <sub>2</sub> with H <sub>2</sub> O | $CO_2 + 2H_2O \xrightleftharpoons{K_f, k_{2f}} HCO_3^- + H_3O^+$                | 6   |
| Formation of carbonate:                                                           | $HCO_3^- + H_2O \xrightleftharpoons{K_g} CO_3^{2-} + H_3O^+$                    | 7   |
| Protonation of APA                                                                | $APA + H_3O^+ \xrightleftharpoons{K_h} APAH^+ + H_2O$                           | 8   |
| Protonation of monocarbamate formed                                               | $APACOO^- + H_3O^+ \xrightleftharpoons{K_i} H^+ APACOO^- + H_2O$                | 9   |
| Protonation of AMP                                                                | $AMP + H_3O^+ \xrightleftharpoons{K_j} AMPH^+ + H_2O$                           | 10  |
| Dissociation of the water molecule                                                | $2H_2O \xrightleftharpoons{K_m} H_3O^+ + OH^-$                                  | 11  |

Where, the equilibrium constants and second-order forward rate coefficients for reactions x, y are represented as  $K_{x(x=a, \dots, m)}$  and  $k_{2y(y=a, \dots, f)}$ , respectively.

In the reaction (2) the rate constant,  $k_{2b}$ , can be viewed as the global rate constant for zwitterion formation and deprotonation reactions. The reaction (4) indicates the APA-dicarbamate formation, where  $k_{2d}$  denotes global rate coefficient. The reaction (3) show the AMP catalyzed APA-carbamate formation and reaction (5) shows APA-dicarbamate production with AMP and APA carbamate.

**Table S2. Density  $\rho$  and Viscosity  $\eta$  for APA (1) + AMP (2) + H<sub>2</sub>O (3) at Different Molar Concentration  $m$  and Temperature  $T$  at a pressure of 0.1 MPa<sup>a</sup>**

| $m_1/m_2$<br>kmol·m <sup>3</sup> | $\rho/\text{kgm}^{-3}$ |         |        |        |        |        |
|----------------------------------|------------------------|---------|--------|--------|--------|--------|
|                                  | 298K                   | 303K    | 308K   | 313K   | 318K   | 323K   |
| 0/3                              | 994.97                 | 992.54  | 989.40 | 986.50 | 983.20 | 979.70 |
| 0.1/2.9                          | 995.90                 | 993.58  | 990.69 | 987.81 | 984.00 | 981.00 |
| 0.3/2.7                          | 997.30                 | 994.87  | 991.71 | 988.91 | 985.20 | 982.20 |
| 0.5/2.5                          | 998.86                 | 995.88  | 992.90 | 989.63 | 986.40 | 982.90 |
| 0.7/2.3                          | 1000.30                | 996.90  | 994.20 | 991.30 | 987.70 | 983.80 |
| 0.9/2.1                          | 1001.70                | 998.50  | 995.50 | 992.30 | 989.00 | 984.90 |
| 1.1/1.9                          | 1003.20                | 1000.10 | 996.90 | 993.60 | 990.30 | 986.30 |
| $m_1/m_2$<br>kmol·m <sup>3</sup> | $\eta/\text{mPas}$     |         |        |        |        |        |
|                                  | 298K                   | 303K    | 308K   | 313K   | 318K   | 323K   |
| 0/3                              | 3.55                   | 2.80    | 2.32   | 1.95   | 1.62   | 1.40   |
| 0.1/2.9                          | 3.71                   | 2.95    | 2.42   | 2.04   | 1.75   | 1.50   |
| 0.3/2.7                          | 3.85                   | 3.05    | 2.56   | 2.16   | 1.85   | 1.60   |
| 0.5/2.5                          | 4.05                   | 3.29    | 2.72   | 2.29   | 1.98   | 1.72   |
| 0.7/2.3                          | 4.31                   | 3.54    | 2.94   | 2.48   | 2.13   | 1.85   |
| 0.9/2.1                          | 4.57                   | 3.79    | 3.16   | 2.68   | 2.28   | 1.98   |
| 1.1/1.9                          | 4.84                   | 4.05    | 3.38   | 2.89   | 2.43   | 2.13   |

<sup>a</sup>Standard uncertainties  $u$  are  $u(T) = 0.25$  K,  $u(m) = 0.001$  kmol·m<sup>3</sup> and  $u(p) = 0.2$  kPa. The combined expanded uncertainty for density measurement  $U_c(\rho) = 3.97$  kg·m<sup>-3</sup> and for viscosity measurement  $U_c(\eta) = 0.058$  mPa·s (95% level of confidence,  $k = 2$ ). Solvent = water.

**Table S3. Excess molar volume, ( $V^E$ ), thermal expansion coefficient ( $\alpha$ ), viscosity deviation ( $\Delta\eta$ ) of ternary blend  $X_1$  APA (1) +  $X_2$  AMP (2) + (1- $X_1$ -  $X_2$ )  $H_2O$  (3) system at different temperature and molar concentration ( $m$ ) ( $X_1, X_2$ = mole fraction)<sup>a</sup>**

| APA (1) + AMP (2) + $H_2O$ (3)   |        |        |                                               |                                            |                         |
|----------------------------------|--------|--------|-----------------------------------------------|--------------------------------------------|-------------------------|
| $m_1/m_2$<br>kmol·m <sup>3</sup> | $X_1$  | $X_2$  | $V^E$<br>(cm <sup>3</sup> mol <sup>-1</sup> ) | $\alpha \times 10^3$<br>(K <sup>-1</sup> ) | $\Delta\eta$<br>(mPa s) |
| T=298 K                          |        |        |                                               |                                            |                         |
| 0/3                              | 0.0000 | 0.0691 | -0.3904                                       | 0.6161                                     | -6.4297                 |
| 0.1/2.9                          | 0.0023 | 0.0671 | -0.4219                                       | 0.6089                                     | -6.0244                 |
| 0.3/2.7                          | 0.0070 | 0.0630 | -0.4751                                       | 0.6149                                     | -5.3815                 |
| 0.5/2.5                          | 0.0118 | 0.0589 | -0.5336                                       | 0.6379                                     | -4.6793                 |
| 0.7/2.3                          | 0.0166 | 0.0547 | -0.5893                                       | 0.6455                                     | -3.9039                 |
| 0.9/2.1                          | 0.0216 | 0.0504 | -0.6461                                       | 0.6600                                     | -3.1169                 |
| 1.1/1.9                          | 0.0266 | 0.0460 | -0.7053                                       | 0.6676                                     | -2.3068                 |
| T=303 K                          |        |        |                                               |                                            |                         |
| 0/3                              | 0.0000 | 0.0691 | -0.3876                                       | 0.6176                                     | -4.8607                 |
| 0.1/2.9                          | 0.0023 | 0.0671 | -0.4220                                       | 0.6103                                     | -4.5277                 |
| 0.3/2.7                          | 0.0070 | 0.0630 | -0.4733                                       | 0.6164                                     | -4.0524                 |
| 0.5/2.5                          | 0.0118 | 0.0589 | -0.5196                                       | 0.6398                                     | -3.4378                 |
| 0.7/2.3                          | 0.0166 | 0.0547 | -0.5658                                       | 0.6477                                     | -2.8032                 |
| 0.9/2.1                          | 0.0216 | 0.0504 | -0.6280                                       | 0.6621                                     | -2.1600                 |
| 1.1/1.9                          | 0.0266 | 0.0460 | -0.6901                                       | 0.6696                                     | -1.4970                 |
| T=308 K                          |        |        |                                               |                                            |                         |
| 0/3                              | 0.0000 | 0.0691 | -0.3717                                       | 0.6196                                     | -3.2603                 |
| 0.1/2.9                          | 0.0023 | 0.0671 | -0.4123                                       | 0.6121                                     | -3.0338                 |
| 0.3/2.7                          | 0.0070 | 0.0630 | -0.4578                                       | 0.6183                                     | -2.6342                 |
| 0.5/2.5                          | 0.0118 | 0.0589 | -0.5088                                       | 0.6418                                     | -2.2152                 |
| 0.7/2.3                          | 0.0166 | 0.0547 | -0.5624                                       | 0.6495                                     | -1.7291                 |
| 0.9/2.1                          | 0.0216 | 0.0504 | -0.6179                                       | 0.6641                                     | -1.2373                 |
| 1.1/1.9                          | 0.0266 | 0.0460 | -0.6758                                       | 0.6718                                     | -0.7385                 |
| T=313 K                          |        |        |                                               |                                            |                         |
| 0/3                              | 0.0000 | 0.0691 | -0.3647                                       | 0.6214                                     | -1.9140                 |
| 0.1/2.9                          | 0.0023 | 0.0671 | -0.4062                                       | 0.6139                                     | -1.7416                 |
| 0.3/2.7                          | 0.0070 | 0.0630 | -0.4541                                       | 0.6201                                     | -1.4526                 |
| 0.5/2.5                          | 0.0118 | 0.0589 | -0.4945                                       | 0.6439                                     | -1.1540                 |
| 0.7/2.3                          | 0.0166 | 0.0547 | -0.5575                                       | 0.6514                                     | -0.7907                 |
| 0.9/2.1                          | 0.0216 | 0.0504 | -0.6064                                       | 0.6662                                     | -0.4138                 |
| 1.1/1.9                          | 0.0266 | 0.0460 | -0.6625                                       | 0.6740                                     | -0.0222                 |
| T=318 K                          |        |        |                                               |                                            |                         |
| 0/3                              | 0.0000 | 0.0691 | -0.3524                                       | 0.6235                                     | -1.2080                 |
| 0.1/2.9                          | 0.0023 | 0.0671 | -0.3821                                       | 0.6163                                     | -1.0241                 |
| 0.3/2.7                          | 0.0070 | 0.0630 | -0.4328                                       | 0.6224                                     | -0.8136                 |
| 0.5/2.5                          | 0.0118 | 0.0589 | -0.4852                                       | 0.6460                                     | -0.5734                 |
| 0.7/2.3                          | 0.0166 | 0.0547 | -0.5399                                       | 0.6537                                     | -0.3100                 |
| 0.9/2.1                          | 0.0216 | 0.0504 | -0.5966                                       | 0.6685                                     | -0.0444                 |
| 1.1/1.9                          | 0.0266 | 0.0460 | -0.6532                                       | 0.6763                                     | 0.2245                  |
| T=323 K                          |        |        |                                               |                                            |                         |
| 0/3                              | 0.0000 | 0.0691 | -0.3379                                       | 0.6257                                     | -0.7933                 |
| 0.1/2.9                          | 0.0023 | 0.0671 | -0.3799                                       | 0.6181                                     | -0.6539                 |

|         |        |        |         |        |         |
|---------|--------|--------|---------|--------|---------|
| 0.3/2.7 | 0.0070 | 0.0630 | -0.4314 | 0.6243 | -0.4730 |
| 0.5/2.5 | 0.0118 | 0.0589 | -0.4723 | 0.6483 | -0.2726 |
| 0.7/2.3 | 0.0166 | 0.0547 | -0.5178 | 0.6563 | -0.0597 |
| 0.9/2.1 | 0.0216 | 0.0504 | -0.5701 | 0.6712 | 0.1549  |
| 1.1/1.9 | 0.0266 | 0.0460 | -0.6298 | 0.6790 | 0.3918  |

**Table S4. Values of  $\Delta H$  and  $\Delta S$  as a function of concentration from (298 to 323) K and  $\Delta G$  against APA mole fraction at 298 K.**

| $X_1$  | $\Delta H$ , (kJ mol <sup>-1</sup> )     | $T\Delta S$ , (kJ mol <sup>-1</sup> ) | $\Delta G$ , (kJ mol <sup>-1</sup> ) |
|--------|------------------------------------------|---------------------------------------|--------------------------------------|
|        | APA (1) + AMP (2) + H <sub>2</sub> O (3) |                                       |                                      |
| 0.0000 | 26.623                                   | 13.424                                | 13.199                               |
| 0.0023 | 27.718                                   | 14.402                                | 13.316                               |
| 0.0070 | 26.767                                   | 13.340                                | 13.427                               |
| 0.0118 | 26.350                                   | 12.778                                | 13.572                               |
| 0.0166 | 26.079                                   | 12.335                                | 13.744                               |
| 0.0216 | 25.810                                   | 11.901                                | 13.909                               |
| 0.0266 | 25.434                                   | 11.364                                | 14.070                               |

**Table S5. Measured Henry's constant of N<sub>2</sub>O ( $H_{N_2O}$ ) and Estimated Henry's constant of CO<sub>2</sub> ( $H_{CO_2}$ ) in APA (1) + AMP (2) + H<sub>2</sub>O (3) at Temperatures  $T$  Using the N<sub>2</sub>O Analogy as a Function of Molar Concentration ( $m$ ) at a pressure of 0.1 MPa<sup>a</sup>**

| $m_1/m_2$<br>kmol·m <sup>3</sup> | $H_{N_2O}$ /kPa·m <sup>3</sup> ·kmol <sup>-1</sup> |      |      |      |      |      | $H_{CO_2}$ /kPa·m <sup>3</sup> ·kmol <sup>-1</sup> |      |      |      |      |      |
|----------------------------------|----------------------------------------------------|------|------|------|------|------|----------------------------------------------------|------|------|------|------|------|
|                                  | 298K                                               | 303K | 308K | 313K | 318K | 323K | 298K                                               | 303K | 308K | 313K | 318K | 323K |
| 0/3                              | 5025                                               | 5471 | 6015 | 6590 | 7285 | 7924 | 3809                                               | 4140 | 4561 | 4751 | 5230 | 5626 |
| 0.1/2.9                          | 4955                                               | 5405 | 5968 | 6550 | 7203 | 7875 | 3756                                               | 4090 | 4526 | 4722 | 5171 | 5591 |
| 0.3/2.7                          | 4895                                               | 5341 | 5910 | 6487 | 7097 | 7807 | 3710                                               | 4041 | 4482 | 4677 | 5095 | 5543 |
| 0.5/2.5                          | 4851                                               | 5285 | 5860 | 6405 | 7025 | 7721 | 3677                                               | 3999 | 4444 | 4618 | 5044 | 5482 |
| 0.7/2.3                          | 4795                                               | 5225 | 5785 | 6345 | 6935 | 7605 | 3634                                               | 3953 | 4387 | 4575 | 4979 | 5400 |
| 0.9/2.1                          | 4730                                               | 5165 | 5728 | 6310 | 6880 | 7555 | 3585                                               | 3908 | 4344 | 4549 | 4940 | 5364 |
| 1.1/1.9                          | 4688                                               | 5135 | 5690 | 6272 | 6845 | 7521 | 3553                                               | 3885 | 4315 | 4522 | 4914 | 5340 |

<sup>a</sup>Standard uncertainties  $u$  are  $u(T) = 0.25$  K,  $u(m) = 0.001$  kmol·m<sup>3</sup>,  $u(p) = 0.2$  kPa. The combined expanded uncertainty for solubility measurement  $U_c(H_{N_2O}) = 66.5$  kPa·m<sup>3</sup>·kmol<sup>-1</sup> (95% level of confidence,  $k = 2$ ). Solvent = water.

**Table S6. Measured Diffusivity of N<sub>2</sub>O ( $D_{N_2O}$ ) and Estimated Diffusivity of CO<sub>2</sub> ( $D_{CO_2}$ ) in APA (1) + AMP (2) + H<sub>2</sub>O (3) at Temperature  $T$  Using the N<sub>2</sub>O Analogy as a Function of Molar Concentration ( $m$ ) at a pressure of 0.1 MPa<sup>a</sup>**

| $m_1/m_2$           | $D_{N_2O} \cdot 10^9 / \text{m}^2\text{s}^{-1}$ |      |      |      |      |      | $D_{CO_2} \cdot 10^9 / \text{m}^2\text{s}^{-1}$ |      |      |      |      |      |
|---------------------|-------------------------------------------------|------|------|------|------|------|-------------------------------------------------|------|------|------|------|------|
| kmol·m <sup>3</sup> | 298K                                            | 303K | 308K | 313K | 318K | 323K | 298K                                            | 303K | 308K | 313K | 318K | 323K |
| 0/3                 | 0.68                                            | 0.82 | 0.97 | 1.16 | 1.31 | 1.49 | 0.73                                            | 0.90 | 1.05 | 1.29 | 1.47 | 1.69 |
| 0.1/2.9             | 0.64                                            | 0.76 | 0.91 | 1.1  | 1.25 | 1.42 | 0.69                                            | 0.83 | 0.98 | 1.22 | 1.40 | 1.61 |
| 0.3/2.7             | 0.6                                             | 0.72 | 0.87 | 1.05 | 1.2  | 1.38 | 0.65                                            | 0.79 | 0.94 | 1.17 | 1.34 | 1.57 |
| 0.5/2.5             | 0.56                                            | 0.68 | 0.83 | 1    | 1.15 | 1.34 | 0.60                                            | 0.75 | 0.90 | 1.11 | 1.29 | 1.52 |
| 0.7/2.3             | 0.52                                            | 0.64 | 0.79 | 0.96 | 1.1  | 1.29 | 0.56                                            | 0.70 | 0.85 | 1.07 | 1.23 | 1.47 |
| 0.9/2.1             | 0.47                                            | 0.61 | 0.75 | 0.92 | 1.05 | 1.24 | 0.51                                            | 0.67 | 0.81 | 1.02 | 1.17 | 1.41 |
| 1.1/1.9             | 0.43                                            | 0.57 | 0.7  | 0.86 | 1    | 1.18 | 0.46                                            | 0.63 | 0.76 | 0.95 | 1.12 | 1.34 |

<sup>a</sup>Standard uncertainties  $u$  are  $u(T) = 0.25$  K,  $u(m) = 0.001$  kmol·m<sup>3</sup> and  $u(p) = 0.2$  kPa. The combined expanded uncertainty for diffusivity measurement  $U_c(D_{N_2O}) = 19.3 \cdot 10^{-12}$  m<sup>2</sup>·s<sup>-1</sup> (95% level of confidence,  $k = 2$ ). Solvent = water.

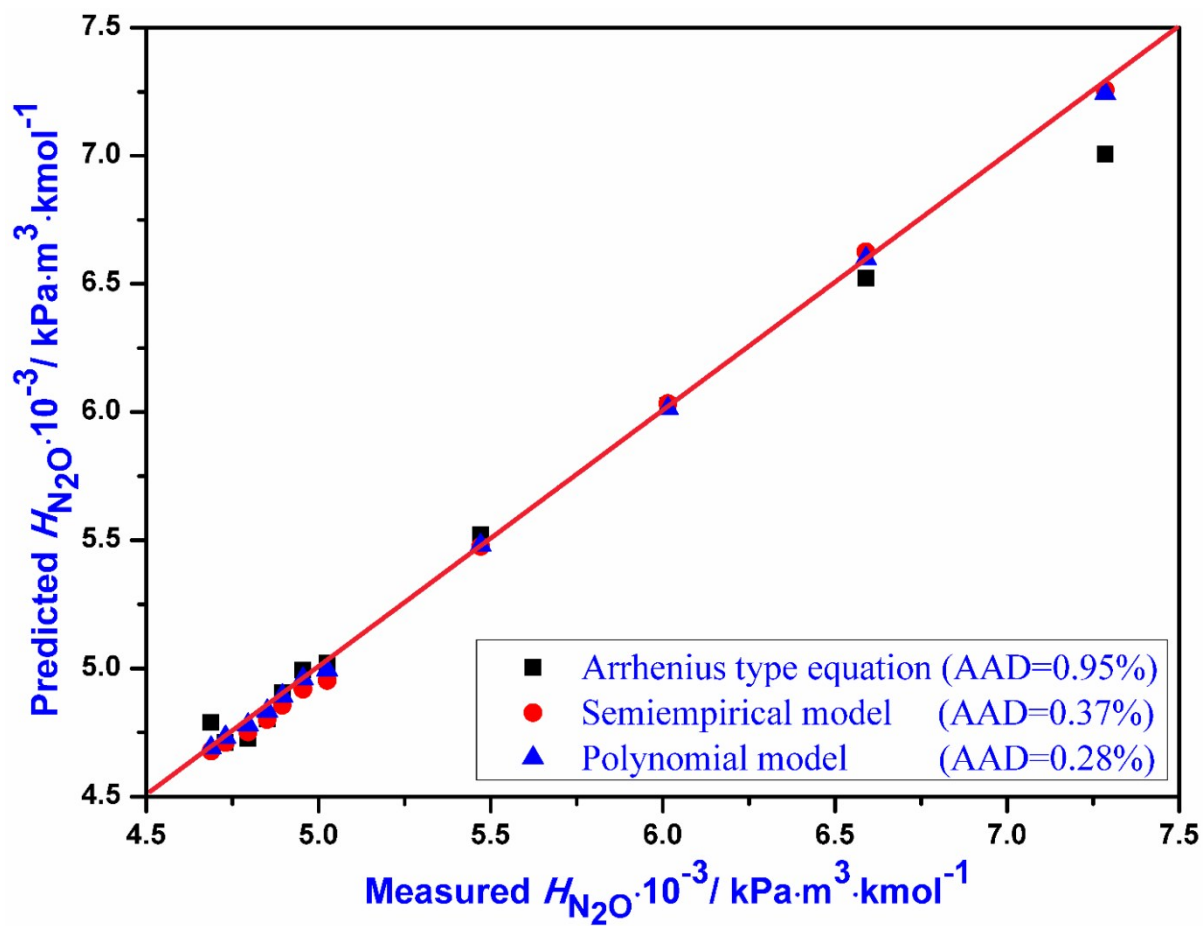

Figure S1

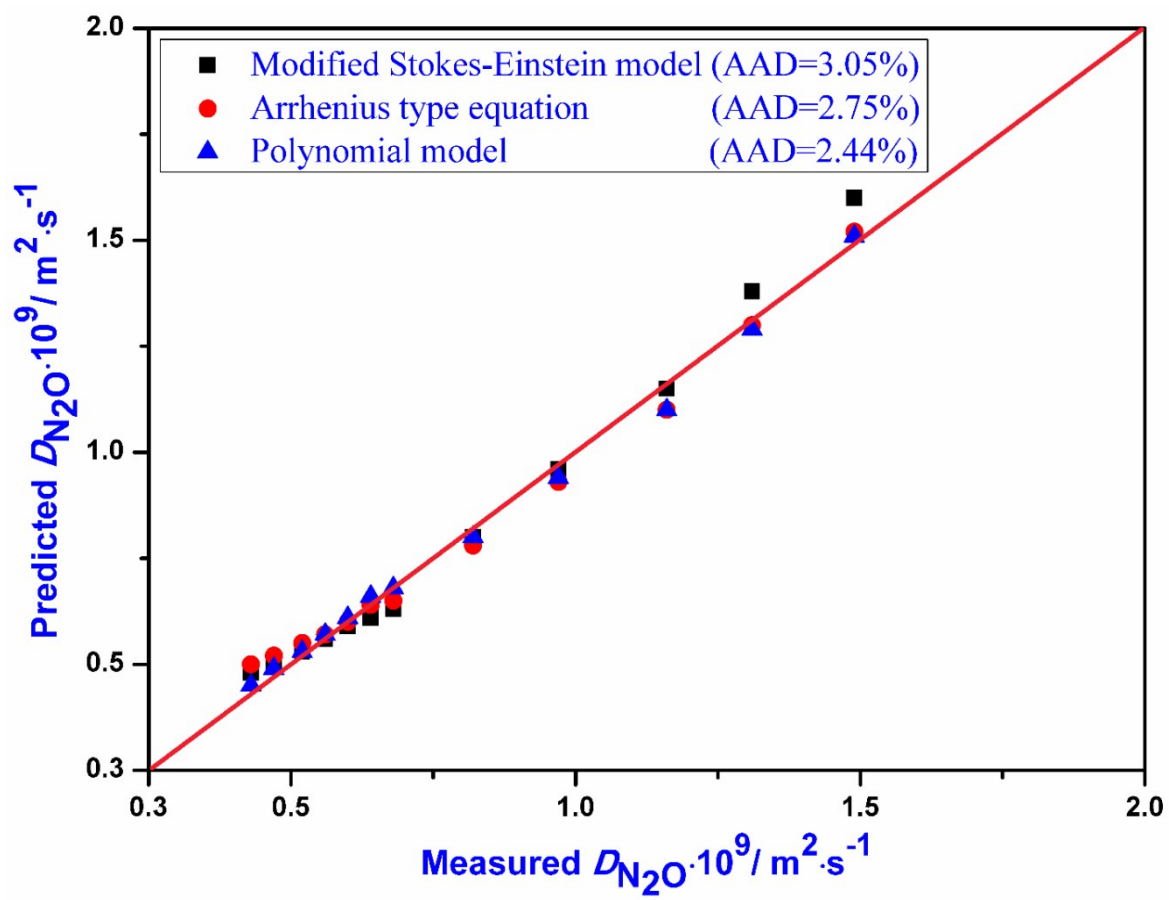

Figure S2
